# Supplementary material for: Improvement of Seed-Mediated Growth of Gold Nanoparticle Labels for DNA Membrane-Based Assays
Source: MDPI journal article supplement (doi:10.3390/bios13010002), 2022-12-21
Supplement: s1 [file s1]

# Improvement of Seed-Mediated Growth of Gold Nanoparticle Labels for DNA Membrane-Based Assays

Galina V. Presnova <sup>1</sup>, Gleb A. Zhdanov <sup>1</sup>, Luibov Yu. Filatova <sup>1</sup>, Mariya M. Ulyashova <sup>1</sup>,  
Denis E. Presnov <sup>2,3,4</sup> and Maya Yu. Rubtsova <sup>1,\*</sup>

<sup>1</sup> Department of Chemistry, Lomonosov Moscow State University, 119991 Moscow, Russia

<sup>2</sup> D.V. Skobeltsyn Institute of Nuclear Physics, M.V. Lomonosov Moscow State University, 119991 Moscow, Russia

<sup>3</sup> MSU Quantum Technology Centre, 119991 Moscow, Russia

<sup>4</sup> Cryoelectronics Lab, Faculty of Physics, M.V. Lomonosov Moscow State University, 119991 Moscow, Russia

\* Correspondence: mrubtsova@gmail.com

**Table S1.** Sequences of the oligonucleotides used in this work.

| Name                                                      | Sequence, 5'→3'                                  |
|-----------------------------------------------------------|--------------------------------------------------|
| Capture oligonucleotide probe                             | TTTTTTTTTTTTTGGATTGGACGAGTCAGGAGC                |
| Non-complementary oligonucleotide probe                   | TTTTTTTTTTTTTCTAGACAGCCACTCATA                   |
| Model target oligonucleotide                              | Biotin-GCTCCTGACTCGTCCAATC                       |
| Capture oligonucleotide probe for TEM type beta-lactamase | TTTTTTTTTTTTTGCTTCCCGGCAACAATTAATAGACTGGATGGAGGC |

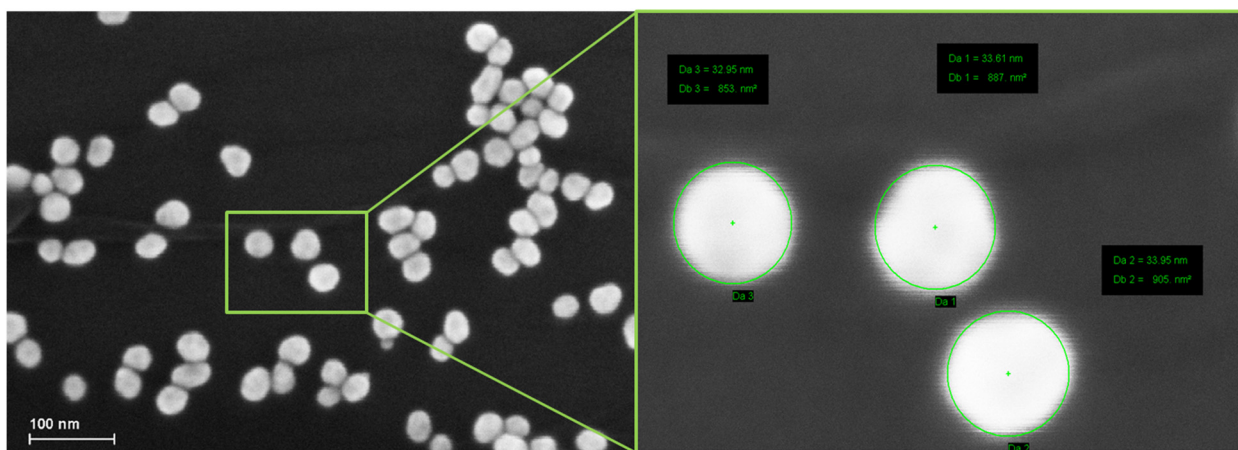

**Figure S1.** SEM images of gold nanoparticles prepared by reduction of tetrachloroauric acid with sodium citrate.

**Table S2.** Characteristics of the spectra of suspensions of gold nanoparticles before and after the enhancement in solution.

| pH value | Parameter                                           | Without amplification | Reaction time |        |        |
|----------|-----------------------------------------------------|-----------------------|---------------|--------|--------|
|          |                                                     |                       | 2 min         | 5 min  | 10 min |
| 2.0      | $\lambda$                                           | 529                   | 550           | 555    | -      |
|          | Peak value                                          | 1.20                  | 0.87          | 0.97   | 0.74   |
|          | The area under the curve in the range of 400-700 nm | 173.73                | 234.68        | 263.66 | 203.99 |
| 3.0      | $\lambda$                                           | 529                   | 541           | 550    | 550    |
|          | Peak value                                          | 1.20                  | 0.96          | 1.07   | 0.74   |
|          | The area under the curve in the range of 400-700 nm | 173.73                | 242.89        | 286.13 | 208.82 |
| 3.5      | $\lambda$                                           | 529                   | 532           | 533    | 532    |
|          | Peak value                                          | 1.20                  | 1.43          | 1.87   | 1.62   |
|          | The area under the curve in the range of 400-700 nm | 173.73                | 265.41        | 345.76 | 299.76 |
| 4.0      | $\lambda$                                           | 529                   | 535           | 534    | 532    |
|          | Peak value                                          | 1.20                  | 2.11          | 2.04   | 2.01   |
|          | The area under the curve in the range of 400-700 nm | 173.73                | 353.42        | 354.87 | 348.96 |
| 5.0      | $\lambda$                                           | 529                   | 536           | 535    | 534    |
|          | Peak value                                          | 1.20                  | 2.18          | 2.13   | 2.06   |
|          | The area under the curve in the range of 400-700 nm | 173.73                | 364.29        | 389.15 | 390.28 |
| 6.0      | $\lambda$                                           | 529                   | 534           | 538    | 537    |
|          | Peak value                                          | 1.20                  | 2.08          | 2.01   | 1.98   |
|          | The area under the curve in the range of 400-700 nm | 173.73                | 386.94        | 416.33 | 415.96 |
| 7.0      | $\lambda$                                           | 529                   | 550           | 550    | 551    |
|          | Peak value                                          | 1.20                  | 2.00          | 1.48   | 1.15   |
|          | The area under the curve in the range of 400-700 nm | 173.73                | 444.19        | 358.09 | 295.63 |
| 8.0      | $\lambda$                                           | 529                   | 550           | 550    | 550    |
|          | Peak value                                          | 1.20                  | 1.39          | 1.09   | 1.05   |
|          | The area under the curve in the range of 400-700 nm | 173.73                | 354.26        | 295.02 | 279.96 |

**Table S3.** Characteristics of the spectra of suspensions of gold nanoparticles in a conjugate with streptavidin before and after the enhancement in solution.

| pH value | Parameter                                           | Without amplification |          | Amplification time |        |        |
|----------|-----------------------------------------------------|-----------------------|----------|--------------------|--------|--------|
|          |                                                     | GNPs                  | Str-GNPs | 2 min              | 5 min  | 10min  |
| 3.0      | $\lambda$                                           | 529                   | 531      | 536                | 548    | 548    |
|          | Peak value                                          | 1.20                  | 1.32     | 1.27               | 1.58   | 1.84   |
|          | The area under the curve in the range of 400-700 nm | 173.73                | 185.67   | 196.33             | 299.93 | 354.65 |
| 4.5      | $\lambda$                                           | 529                   | 531      | 546                | 546    | 546    |
|          | Peak value                                          | 1.20                  | 1.32     | 1.19               | 1.51   | 1.81   |
|          | The area under the curve in the range of 400-700 nm | 173.73                | 185.67   | 233.12             | 305.60 | 376.60 |
| 6.0      | $\lambda$                                           | 529                   | 531      | 556                | 556    | 556    |
|          | Peak value                                          | 1.20                  | 1.32     | 1.54               | 1.72   | 1.77   |
|          | The area under the curve in the range of 400-700 nm | 173.73                | 185.67   | 368.67             | 425.41 | 440.17 |
